# Supplementary material
Source: ML conference proceedings conference paper supplement (https://proceedings.neurips.cc/paper_files/paper/2012/hash/2715518c875999308842e3455eda2fe3-Abstract.html)
Supplement: Supplementary file [file 2715518c875999308842e3455eda2fe3-Supplemental.zip]

---

# Supplemental Material

---

**Jason L. Pacheco**

Department of Computer Science  
Brown University  
Providence, RI  
pacheco@cs.brown.edu

**Erik B. Sudderth**

Department of Computer Science  
Brown University  
Providence, RI  
sudderth@cs.brown.edu

## 1 Gradient Calculations

### 1.1 Discrete

The gradients can be expressed more compactly by first defining the discrete BP fixed points given by [1],

$$\tau_s^{BP}(x_s; \lambda) = \varphi_s(x_s) \exp \left\{ \frac{1}{n_s - 1} \sum_{t \in N(s)} \lambda_{ts}(x_s) \right\} \quad (1)$$

$$\tau_{st}^{BP}(x_s, x_t; \lambda) = \phi_{st}(x_s, x_t) \exp \left\{ \lambda_{ts}(x_s) + \lambda_{st}(x_t) \right\}. \quad (2)$$

The gradients take an intuitive then take the intuitive form,

$$\frac{\partial \mathcal{L}_c}{\partial \tau_s(x_s)} = (n_s - 1) \left[ \log \tau_s^{BP}(x_s) - \log \tau_s(x_s) - 1 \right] - \xi_s + c [C_{ts}(x_s; \tau) - C_s(\tau)] \quad (3)$$

$$\frac{\partial \mathcal{L}_c}{\partial \tau_{st}(x_s)} = \log \tau_{st}(x_s, x_t) + 1 - \log \tau_{st}^{BP}(x_s, x_t) - c [C_{ts}(x_s; \tau) + C_{st}(x_t; \tau)]. \quad (4)$$

It is then obvious that any zero-gradient must not only satisfy the constraints, but also be of the form defined by BP fixed-point equations.

### 1.2 Gaussian

The derivative w.r.t. the node variance is given by,

$$\begin{aligned} \frac{\partial \mathcal{L}}{\partial V_s} &= \frac{n_s - 1}{2} \left[ V_s^{-1} - A_s - \frac{1}{n_s - 1} \sum_{t \in N(s)} \lambda_{st} \right] \\ &\quad + c \sum_{t \in N(s)} [V_s - V_{ts}] + \kappa \sum_{t \in N(s)} [\log V_s - \log V_{ts}] V_s^{-1}, \end{aligned} \quad (5)$$

and for the diagonal and off-diagonal elements of the pairwise variance as,

$$\frac{\partial \mathcal{L}}{\partial V_{ts}} = \frac{1}{2} [A_s + \lambda_{st} - |\Sigma_{st}|^{-1} V_{st}] + c [V_{ts} - V_s] + \kappa [\log V_{ts} - \log V_s] \quad (6)$$

$$\frac{\partial \mathcal{L}}{\partial \Sigma_{st}^{st}} = J_{st} + |\Sigma_{st}|^{-1} \Sigma_{st}^{st}. \quad (7)$$

### 1.3 Conditional Gaussian

The full joint distribution of the model is,

$$\begin{aligned} p(x, z) &= \varphi_0(x) \prod_{i=1}^n \psi_0(z_i) \varphi_i(x, z_i; y_i) \\ &= N(x \mid \mu_0, P_0) \prod_{i=1}^n (1 - \beta_i)^{1-z_i} \beta_i^{z_i} N(y_i \mid 0, \sigma_0^2)^{1-z_i} N(y_i \mid x, \sigma_1^2)^{z_i}. \end{aligned} \quad (8)$$

Using the chain rule for entropy  $H(X, Z) = H(Z) + H(X \mid Z)$  we compute the (negative) Bethe entropy as,

$$\begin{aligned} -H(X, Z) &= -\sum_{i=1}^n (H(Z_i) + H(X \mid Z_i)) \\ &= \sum_i ((1 - \beta_i) \log(1 - \beta_i) + \beta_i \log \beta_i) - \sum_i \left( (1 - \beta_i) \frac{1}{2} \log 2\pi e V_{i0} + \beta_i \frac{1}{2} \log 2\pi e V_{i1} \right) \end{aligned} \quad (9)$$

The Bethe free energy for the conditional Gaussian model is,

$$\mathcal{F}_{CGB}(m, V, \beta) = \sum_{i=1}^n \mathbb{E}_i [\log q_i(x, z_i) - \log \phi_i(x, z_i)] - (n - 1) \mathbb{E}_i [\log q_0(x) - \log \varphi_0(x)],$$

where  $\phi_i(x, z_i) = \varphi_0(x) \psi_0(z_i) \varphi_i(x, z_i; y_i)$ . Expanding terms we have,

$$\begin{aligned} \mathcal{F}_{CGB}(m, V, \beta) &= (N - 1) \frac{1}{2} \log V_0 - (N - 1) \frac{1}{2} (V_0 + m_0^2) P_0^{-1} + (N - 1) m_0 P_0^{-1} \mu_0 \\ &\quad \sum_i (1 - \beta_i) \left\{ \log(1 - \beta_i) - \frac{1}{2} \log V_{i0} - \gamma_{i0} + \frac{1}{2} (V_{i0} + m_{i0}^2) P_0^{-1} - m_{i0} P_0^{-1} \mu_0 - \log(1 - \beta_0) \right\} + \\ &\quad \sum_i \beta_i \left\{ \log \beta_i - \frac{1}{2} \log V_{i1} - \gamma_{i1} + \frac{1}{2} (V_{i1} + m_{i1}^2) (P_0^{-1} + \sigma_1^{-2}) - m_{i1} (P_0^{-1} \mu_0 + \sigma_1^{-2} y_i) - \log \beta_0 \right\} \end{aligned} \quad (10)$$

with the shorthand notation  $\gamma_{ij} = \log N(y_i \mid 0, \sigma_j^2)$ . Note that while the free energy is bounded on the set of expectation constraints [2] the entropy term  $\log V_0$  means that the free energy is unbounded below off of the constraint set as  $V_0 \rightarrow \infty$  at an exponential rate. Such an objective can be problematic for MoM optimization and so we add an additional penalty,

$$\mathcal{F}_{CGB}(m, V, \beta) + \frac{\kappa}{2} \sum_i |\log V_0 - \log \bar{V}_i|^2,$$

for some fixed  $\kappa \geq 1$  where the Gaussian mixture variance is denoted,

$$\begin{aligned} \bar{V}_i &= (1 - \beta_i) V_{i0} + \beta_i V_{i1} + (1 - \beta_i) (m_{i0} - \bar{m}_i)^2 + \beta_i (m_{i1} - \bar{m}_i)^2 \\ \bar{m}_i &= (1 - \beta_i) m_{i0} + \beta_i m_{i1}. \end{aligned}$$

This added term is quadratic in  $\log V_0$ , thus bounding the objective off of the constraint set. The augmented Lagrangian is,

$$\begin{aligned} \mathcal{L}_c(m, V, \beta) &= \mathcal{F}(m, V, \beta) + \frac{\kappa}{2} \sum_i [\log V_0 - \log \bar{V}_i]^2 + \sum_i \eta_i [m_0 - \bar{m}_i] + \sum_i \lambda_i [V_0 - \bar{V}_i] \\ &\quad + \frac{c}{2} \sum_i [m_0 - \bar{m}_i]^2 + \frac{c}{2} \sum_i [V_0 - \bar{V}_i]^2 \end{aligned}$$

Gradients of the Gaussian marginal moments are,

$$\begin{aligned} \frac{\partial \mathcal{L}_c}{\partial V_0} &= (N - 1) \frac{1}{2} V_0^{-1} - (N - 1) \frac{1}{2} P_0^{-1} + \sum_i \lambda_i + c \sum_i [V_0 - \bar{V}_i] + \kappa V_0^{-1} \sum_i [\log V_0 - \log \bar{V}_i] \\ \frac{\partial \mathcal{L}_c}{\partial m_0} &= -(N - 1) m_0 P_0^{-1} + (N - 1) P_0^{-1} \mu_0 + \sum_i \eta_i + c \sum_i (m_0 - \bar{m}_i). \end{aligned}$$

Gradients of the mixture variances,

$$\begin{aligned}\frac{\partial \mathcal{L}_c}{\partial V_{i0}} &= (1 - \beta_i) \left\{ \frac{1}{2} P_0^{-1} - \frac{1}{2} V_{i0}^{-1} - \lambda_i - c(V_0 - \bar{V}_i) - \kappa(\log V_0 - \log \bar{V}_i) \bar{V}_i^{-1} \right\} \\ \frac{\partial \mathcal{L}_c}{\partial V_{i1}} &= \beta_i \left\{ \frac{1}{2} (P_0^{-1} + \sigma_1^{-2}) - \frac{1}{2} V_{i1}^{-1} - \lambda_i - c(V_0 - \bar{V}_i) - \kappa(\log V_0 - \log \bar{V}_i) \bar{V}_i^{-1} \right\}.\end{aligned}$$

Gradients of the mixture means,

$$\begin{aligned}\frac{\partial \mathcal{L}_c}{\partial m_{i0}} &= (1 - \beta_i) \left\{ m_{i0} P_0^{-1} - P_0^{-1} \mu_0 - \eta_i - c(m_0 - \bar{m}_i) \right. \\ &\quad \left. + 2\beta_i(m_{i1} - m_{i0}) [\lambda_i + c(V_0 - \bar{V}_i) + \kappa(\log V_0 - \log \bar{V}_i) \bar{V}_i^{-1}] \right\} \\ \frac{\partial \mathcal{L}_c}{\partial m_{i1}} &= \beta_i \left\{ m_{i1} (P_0^{-1} + \sigma_1^{-2}) - P_0^{-1} \mu_0 - \sigma_1^{-2} y_i - \eta_i - c(m_0 - \bar{m}_i) \right. \\ &\quad \left. + 2(1 - \beta_i)(m_{i0} - m_{i1}) [\lambda_i + c(V_0 - \bar{V}_i) + \kappa(\log V_0 - \log \bar{V}_i) \bar{V}_i^{-1}] \right\}\end{aligned}$$

For the mixture weights we first introduce some shorthand notation,

$$\begin{aligned}\xi_{i0}(m, V, \beta) &= \log(1 - \beta_i) - \frac{1}{2} \log V_{i0} - \gamma_{i0} + \frac{1}{2} (V_{i0} + m_{i0}^2) P_0^{-1} - m_{i0} P_0^{-1} \mu_0 \\ \xi_{i1}(m, V, \beta) &= \log \beta_i - \frac{1}{2} \log V_{i1} - \gamma_{i1} + \frac{1}{2} (V_{i1} + m_{i1}^2) (P_0^{-1} + \sigma_1^{-2}) - m_{i1} (P_0^{-1} \mu_0 + \sigma_1^{-1} y_i),\end{aligned}$$

we similarly define shorthand for partials of the mean and variance constraints,

$$\begin{aligned}m' &= \frac{\partial C_i^{mean}}{\partial \beta_i} = m_{i0} - m_{i1} \\ V' &= \frac{\partial C_i^{var}}{\partial \beta_i} = V_{i0} - V_{i1} + (m_{i0} - \bar{m}_i)^2 - (m_{i1} - \bar{m}_i)^2 \\ &\quad - 2 * (m_{i0} - m_{i1}) ((1 - \beta_i)(m_{i0} - \bar{m}) + \beta_i(m_{i1} - \bar{m}_i))\end{aligned}$$

and the derivative w.r.t. the mixture weights is given by,

$$\begin{aligned}\frac{\partial \mathcal{L}_c}{\partial \beta_i} &= -\xi_{i0}(m, V, \beta) + \xi_{i1}(m, V, \beta) \\ &\quad + m'(\eta_i + c(m_0 - \bar{m}_i)) + V'(\lambda_i + c(V_0 - \bar{V}_i) + c\bar{V}_i^{-1}(\log V_0 - \log \bar{V}_i))\end{aligned}$$

## References

- [1] J.S. Yedidia, W.T. Freeman, and Y. Weiss. Constructing free-energy approximations and generalized belief propagation algorithms. *Information Theory, IEEE Transactions on*, 51(7):2282–2312, 2005.
- [2] T. P. Minka. Expectation propagation for approximate bayesian inference. *Uncertainty in Artificial Intelligence*, 17:362–369, 2001.
